# Supplementary material
Source: PubMed Central journal article supplement (PMC5760291)
Supplement: NIHMS919727-supplement-1.pdf [file NIHMS919727-supplement-1.pdf]

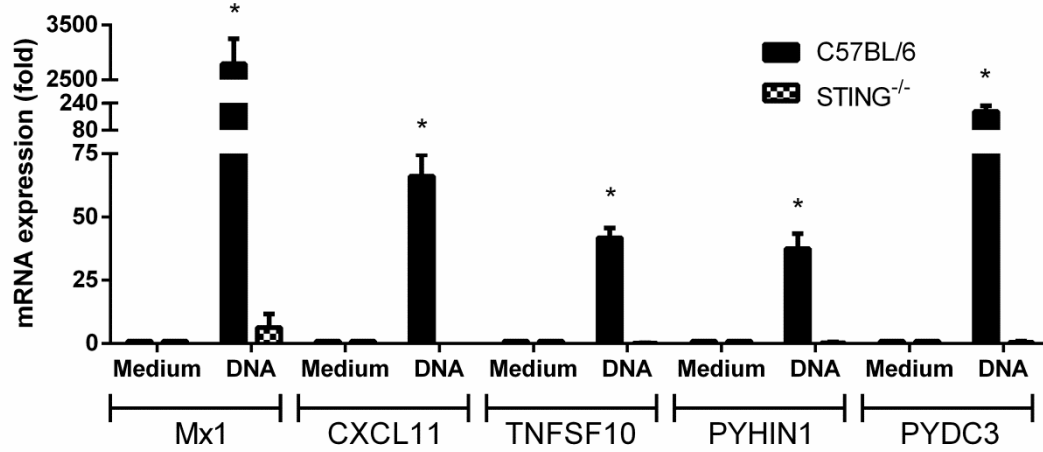

**Supplementary Figure 1.** qPCR analysis of BMDMs from STING<sup>-/-</sup> transfected with *Brucella* DNA compared to wild-type macrophages for the following genes: MX1, CXCL11, TNFSF10, Pyhin1 and Pydc3 . Significant differences comparing WT versus STING are denoted by an asterisk (two way ANOVA,  $p < 0.05$ ).

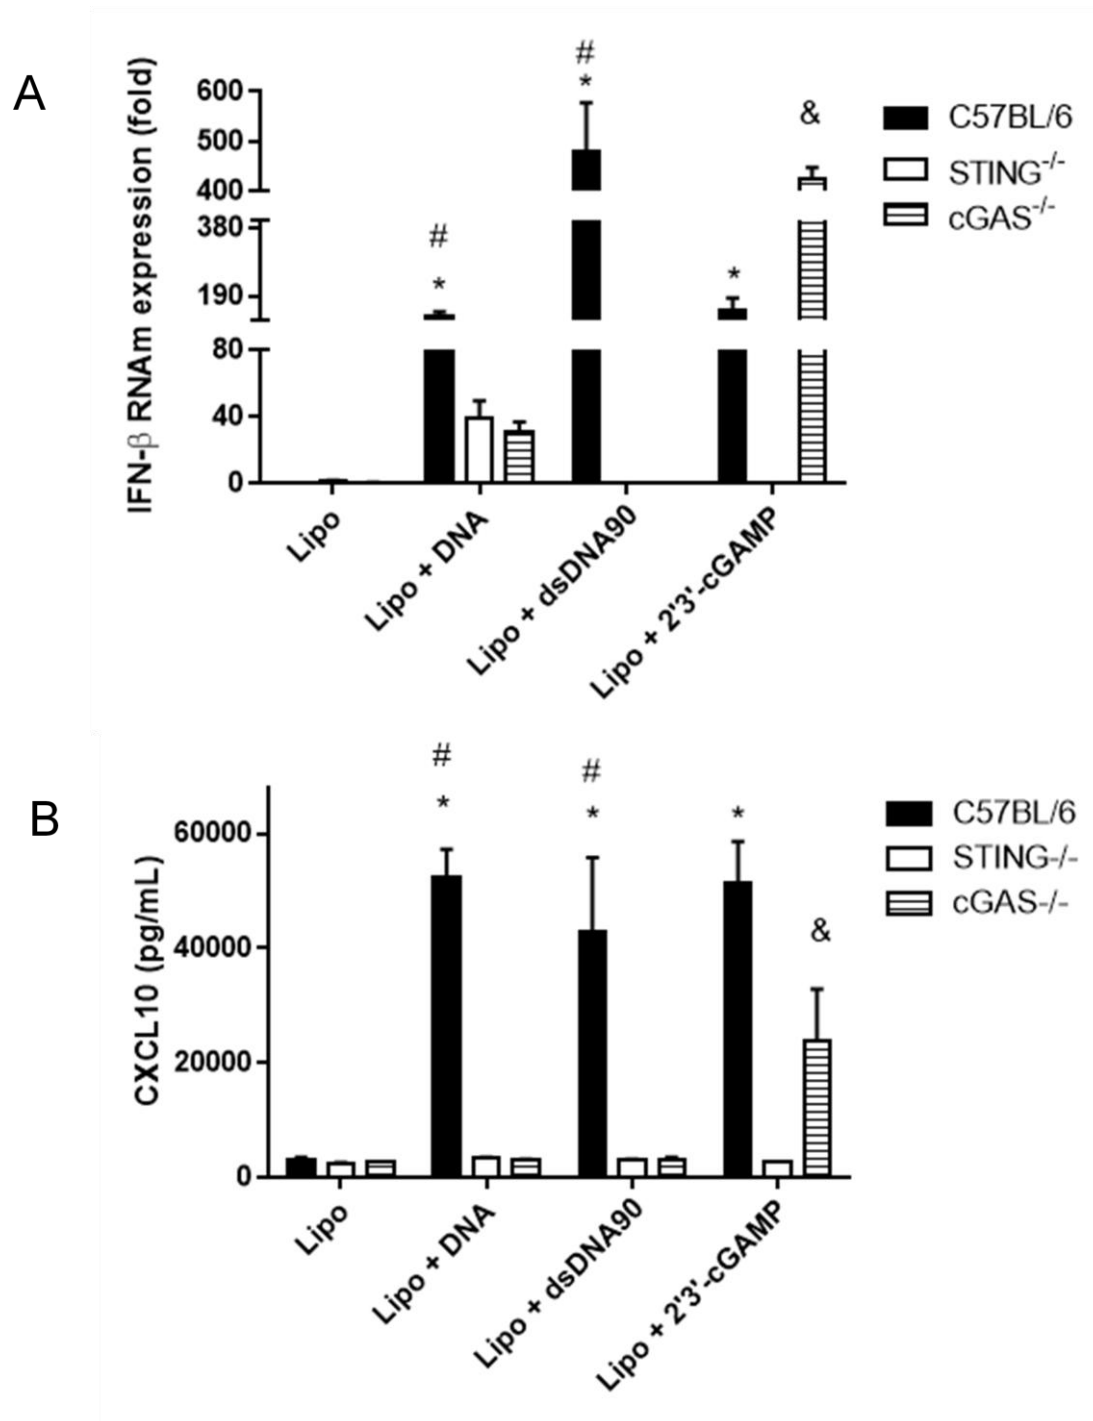

**Supplementary Figure 2.** Reduced expression of the gene encoding IFN- $\beta$  and CXCL10 production in STING<sup>-/-</sup> and cGAS<sup>-/-</sup> BMDM. Macrophages derived from C57BL/6, STING<sup>-/-</sup> and cGAS<sup>-/-</sup> mice were transfected with DNA purified from *B. abortus* (1  $\mu$ g/well) encapsulated with lipofectamine, transfected with dsDNA90 (3  $\mu$ g/mL) as a positive control, transfected with 2'3'-cGAMP (3  $\mu$ g/well) or lipofectamine alone as control. After 17h, (A) total RNA was purified and the gene expression of IFN- $\beta$  was analyzed by qPCR and (B) culture supernatant were harvested to measure CXCL10 by ELISA assay. Significant differences between STING<sup>-/-</sup> related to C57BL/6 are denoted by an asterisk, between cGAS<sup>-/-</sup> compared to C57BL/6 are denoted by # and STING<sup>-/-</sup> compared to cGAS<sup>-/-</sup> are denoted by &.

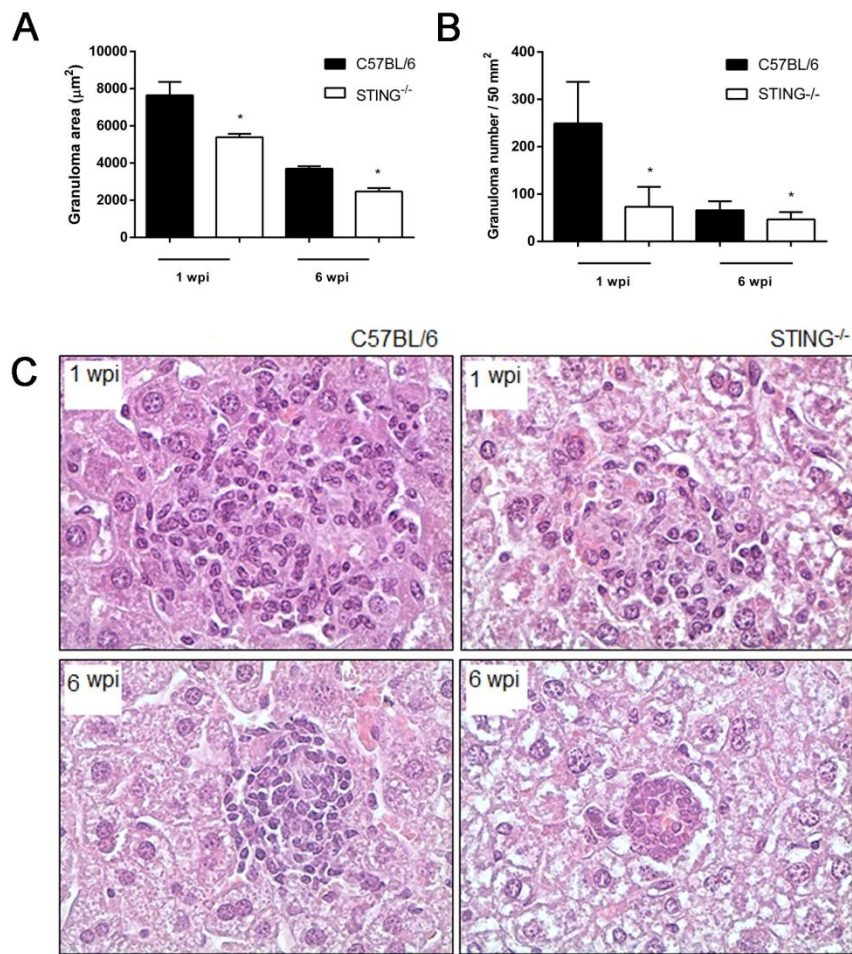

**Supplementary Figure 3. Lack of STING modulates liver granuloma formation.**

The number (A) and area (B) of granulomas from C57BL/6 and STING<sup>-/-</sup> (n=5) were measured at 1 and 6 weeks postinfection (wpi). Medial liver lobes from C57BL/6 and STING<sup>-/-</sup> infected with *B. abortus* were fixed in 10% buffered formaldehyde solution and embedded in paraffin. Tissue sections were processed and stained with H&E to evaluate the formation of granulomas. Granuloma numbers were normalized for 50 mm<sup>2</sup> of hepatic tissue. These graphs are representative of two independent experiments. (C) Digital images of representative granulomas (original magnification x40). Significant differences from STING KO compared to C57BL/6 are denoted by an asterisk (two-way ANOVA,  $p < 0.05$ ). Size bar shown corresponds to 50  $\mu\text{m}$ .

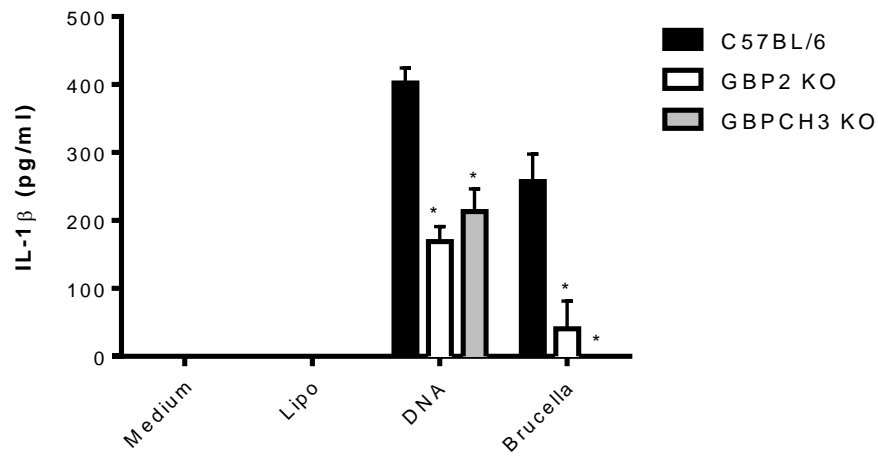

**Supplementary Figure 4.** BMDMs derived from C57BL/6, GBP2 KO and GBPCH3 KO mice were infected with *B. abortus* (MOI 100:1), transfected with lipofectamine or *Brucella* genomic DNA (1 $\mu$ g/well). Culture supernatants were harvested 17 hrs postinfection and IL-1 $\beta$  secretion was determined by ELISA.
